# Supplementary figures and images for: 2D–2D WO3–Bi2WO6 photocatalyst with an S-scheme heterojunction for highly efficient Cr(vi) reduction
Source: Royal Society of Chemistry journal article supplement (doi:10.1039/d2ce01024k), 2022-01-01

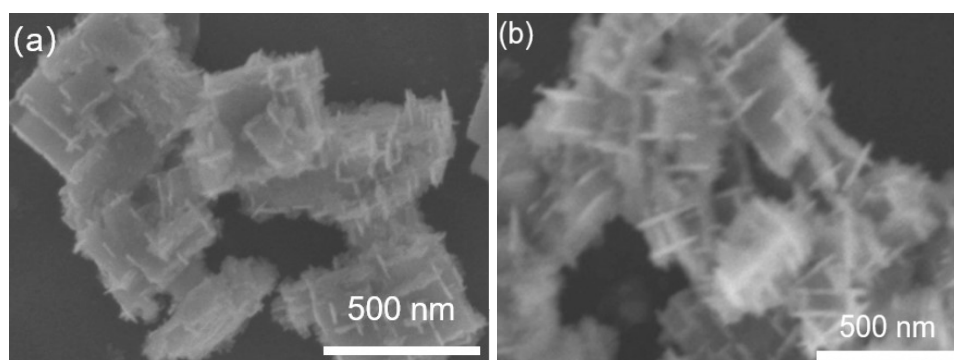

**Fig. S1** SEM of S2 sample before (a) and after (b) cycling.

Supplement: d2ce01024k1.pdf [file d2ce01024k1.pdf]
